# Supplementary material
Source: publisher figshare collection journal article supplement (https://acs.figshare.com/ndownloader/files/5839713)
Supplement: Supplementary file 1 [file 5839713]

# An Efficient Entry into Medium Ring Keto-Lactones. The Ruthenium Tetraoxide-Promoted Oxidative Cleavage of $\beta$ -Hydroxyethers

Helena M. C. Ferraz\* and Luiz S. Longo Jr.

Instituto de Química, Universidade de São Paulo,  
CEP 05508-900, São Paulo SP, Brazil.

hmferraz@iq.usp.br

## Supporting Information

### Table of Contents

|                                                                                               | <i>page</i> |
|-----------------------------------------------------------------------------------------------|-------------|
| General Methods.....                                                                          | S2          |
| 1. RuO <sub>4</sub> -Promoted Oxidative Cleavage of Hexahydro-benzofuran-3a-ols <b>1a-d</b> . |             |
| General Procedure.....                                                                        | S2          |
| 2. Reaction of Hexahydro-benzofuran-3-ol <b>4a</b> with Ruthenium Tetraoxide.....             | S3          |
| 3. Reaction of Hexahydro-benzofuran-3-ol <b>4b</b> with Ruthenium Tetraoxide.....             | S4          |
| Figure S1. <sup>1</sup> H NMR spectrum of <b>3a</b> .....                                     | S5          |
| Figure S2. <sup>13</sup> C NMR spectrum of <b>3a</b> .....                                    | S6          |
| Figure S3. <sup>1</sup> H NMR spectrum of <b>3b</b> .....                                     | S7          |
| Figure S4. <sup>13</sup> C NMR spectrum of <b>3b</b> .....                                    | S8          |
| Figure S5. COSY spectrum of <b>3b</b> .....                                                   | S9          |
| Figure S6. HETCOR spectrum of <b>3b</b> .....                                                 | S10         |
| Figure S7. <sup>1</sup> H NMR spectrum of <b>3c</b> .....                                     | S11         |
| Figure S8. <sup>13</sup> C NMR spectrum of <b>3c</b> .....                                    | S12         |
| Figure S9. <sup>1</sup> H NMR spectrum of <b>3d</b> .....                                     | S13         |

|                                                             |     |
|-------------------------------------------------------------|-----|
| Figure S10. $^{13}\text{C}$ NMR spectrum of <b>3d</b> ..... | S14 |
| References.....                                             | S15 |

---

**General Methods.** Ruthenium trichloride hydrate ( $\text{RuCl}_3 \cdot n\text{H}_2\text{O}$ ) was purchased from Aldrich and used as received. Calculations were based on  $n = 1$ . The other reagents and solvents were also purchased from standard chemical suppliers and were purified by usual methods. The filtration on silica pad was performed using silica gel Acros (80-230 Mesh). TLC analyses were performed with silica gel plates Merck, using vanilline or *p*-anisaldehyde solution for visualization.

### 1. $\text{RuO}_4$ -Promoted Oxidative Cleavage of Hexahydro-benzofuran-3a-ols **1a-d**.

**General Procedure.** To 7 mL of a 3:2:2 mixture of  $\text{H}_2\text{O}:\text{CCl}_4:\text{CH}_3\text{CN}$ , respectively, was added 1 mmol of the hexahydro-benzofuran-3a-ols **1a-d**. To this solution were added 4.1 mmol of  $\text{NaIO}_4$  and 2.4 mol% of  $\text{RuCl}_3 \cdot n\text{H}_2\text{O}$ . The reactional mixture was magnetically stirred at room temperature for 1h 15 min. Then, water was added and the aqueous phase was extracted with  $\text{CH}_2\text{Cl}_2$  (three times). The combined organic phases were washed with brine (twice) and concentrated by removing part of the solvent under reduced pressure. The resulting residue was then filtered through a small silica gel pad (*ca.* 10cm), washing with  $\text{CH}_2\text{Cl}_2$ . The filtrate was dried over anhydrous  $\text{MgSO}_4$  and the solvent was removed under reduced pressure to afford **3a-d** in the yields shown in Scheme 1 and Table 1, with more than 99% chromatographic purity.

**1.1. *trans*-4,8-Dimethyl-oxonane-2,7-dione (3a):** colorless oil; IR (film) 1739 and 1719  $\text{cm}^{-1}$ ;  $^1\text{H}$  NMR (500 MHz,  $\text{CDCl}_3$ )  $\delta$  0.98 (d,  $J = 6.7$  Hz, 3H), 1.06 (d,  $J = 6.8$  Hz, 3H), 1.48-1.55 (m, 1H), 1.96-2.16 (m, 3H), 2.21 (ddd,  $J = 4.6, 7.0$  and 15.4 Hz, 1H), 2.47 (ddd,  $J = 0.8, 3.7$  and 14.1 Hz, 1H), 2.64 (ddd,  $J = 3.7, 10.8$  and 15.4 Hz, 1H), 3.19-3.26 (m, 1H), 3.82 (dd,  $J = 8.8$  and 10.6 Hz, 1H), 4.91 (dd,  $J = 7.2$  and 10.6 Hz, 1H);  $^{13}\text{C}$  NMR (125 MHz,  $\text{CDCl}_3$ )  $\delta$  13.2, 22.6, 30.1, 31.8, 41.1, 42.5, 43.6, 67.0, 173.9, 213.0; MS  $m/z$  184 (0.2,  $\text{M}^+$ ); HRMS calcd for  $\text{C}_{10}\text{H}_{16}\text{O}_3$  184.1099, found 184.1090.

**1.2. 4-Methyl-oxonane-2,7-dione (3b):** colorless oil; IR (film) 1738 and 1712  $\text{cm}^{-1}$ ;  $^1\text{H}$  NMR (300 MHz,  $\text{CDCl}_3$ )  $\delta$  0.99 (d,  $J = 6.5$  Hz, 3H), 1.51-1.63 (m, 1H), 1.89-2.12 (m, 3H), 2.25 (ddd,  $J = 4.3, 6.6$  and 14.9 Hz, 1H), 2.45-2.50 (m, 1H), 2.59 (ddd,  $J = 3.7, 11.2$  and 14.9 Hz, 1H), 2.69 (dt,  $J = 6.7$  and 13.4 Hz, 1H), 2.87 (dt,  $J = 6.7$  and 13.4 Hz, 1H), 4.39 (dt,  $J = 6.7$  and 10.9 Hz, 1H), 4.75 (dt,  $J = 6.7$  and 10.9 Hz, 1H);  $^{13}\text{C}$  NMR (75 MHz,  $\text{CDCl}_3$ )  $\delta$  23.1, 32.0, 32.4, 41.5, 41.7, 42.9, 60.7, 174.2, 211.1; MS  $m/z$  170 (4.8,  $\text{M}^+$ ); HRMS calcd for  $\text{C}_9\text{H}_{14}\text{O}_3$  170.0943, found 170.0947.

**1.3. 4-tert-Butyl-oxonane-2,7-dione (3c):** colorless oil; IR (film) 1738 and 1709  $\text{cm}^{-1}$ ;  $^1\text{H}$  NMR (500 MHz,  $\text{CDCl}_3$ )  $\delta$  0.89 (s, 9H), 1.55-1.61 (m, 2H), 1.94-2.08 (m, 2H), 2.26-2.36 (m, 2H), 2.51-2.57 (m, 2H), 3.10 (ddd,  $J = 6.2, 10.3$  and 13.2 Hz, 1H), 4.36 (dt,  $J = 5.1$  and 10.5 Hz, 1H), 4.72 (ddd,  $J = 3.2, 6.3$  and 10.5 Hz, 1H);  $^{13}\text{C}$  NMR (75 MHz,  $\text{CDCl}_3$ )  $\delta$  24.8, 27.2, 34.0, 37.4, 39.4, 46.5, 46.9, 61.9, 175.1, 211.4; MS  $m/z$  212 (2.4,  $\text{M}^+$ ); HRMS calcd for  $\text{C}_{12}\text{H}_{20}\text{O}_3$  212.1412, found 212.1416.

**1.4. trans-4-tert-Butyl-8-methyl-oxonane-2,7-dione (3d):** white solid; IR (KBr) 1726 and 1717  $\text{cm}^{-1}$ ;  $^1\text{H}$  NMR (300 MHz,  $\text{CDCl}_3$ )  $\delta$  0.89 (s, 9H), 0.99 (d,  $J = 6.7$  Hz, 3H), 1.54-1.64 (m, 2H), 1.91-2.08 (m, 2H), 2.20-2.30 (m, 1H), 2.51-2.59 (m, 2H), 3.27-3.39 (m, 1H), 3.86 (t,  $J = 10.2$  Hz, 1H), 4.70 (dd,  $J = 6.0$  and 10.2 Hz, 1H);  $^{13}\text{C}$  NMR (75 MHz,  $\text{CDCl}_3$ )  $\delta$  13.0, 24.6, 27.2, 33.9, 37.3, 41.5, 45.7, 46.4, 67.8, 174.9, 214.4; MS  $m/z$  226 (1.3,  $\text{M}^+$ ); Anal. Calcd for  $\text{C}_{13}\text{H}_{22}\text{O}_3$ : C, 68.99; H, 9.80. Found: C, 69.06; H, 9.72.

**2. Reaction of Hexahydro-benzofuran-3-ol 4a with Ruthenium Tetraoxide.** To a solution of **4a** (0.227 g, 1.34 mmol) in 10.5 mL of a mixture of  $\text{H}_2\text{O}:\text{CCl}_4:\text{CH}_3\text{CN}$  (3:2:2) was added  $\text{NaIO}_4$  (1.17 g, 5.49 mmol) and  $\text{RuCl}_3 \cdot n\text{H}_2\text{O}$  (0.014 g, 5.0 mol%). The reactional mixture was magnetically stirred at room temperature for 30 min. Then, water was added and the aqueous phase was extracted with  $\text{CH}_2\text{Cl}_2$  (three times). The combined organic phases were washed with brine (twice) and dried over anhydrous  $\text{MgSO}_4$ . The solvent was removed under reduced pressure and the crude product was purified by flash chromatography (gradient elution 0-20% AcOEt in hexanes) affording **5** (0.101 g, 0.656 mmol, 48%) as a colorless oil. **2-Acetyl-5-methyl-cyclohexanone 5:**<sup>1</sup> IR (film) 1715 and

1611  $\text{cm}^{-1}$ ;  $^1\text{H}$  NMR (300 MHz,  $\text{CDCl}_3$ )  $\delta$  1.00 (d,  $J = 6.5$  Hz, 3H), 1.18-1.32 (m, 1H), 1.70-1.85 (m, 2H), 1.94-2.03 (m, 1H), 2.13 (s, 3H), 2.30-2.43 (m, 3H), 15.9 (s, 1H);  $^{13}\text{C}$  NMR (125 MHz,  $\text{CDCl}_3$ )  $\delta$  21.3, 23.8, 25.1, 28.0, 30.9, 39.2, 106.5, 181.6, 199.0; MS  $m/z$  154 (59,  $\text{M}^+$ ). Dione **5** exists predominantly in the enol form.<sup>2</sup>

**3. Reaction of Hexahydro-benzofuran-3-ol 4b with Ruthenium Tetraoxide.** To a solution of **4b** (1.03 g, 6.06 mmol) in 42 mL of a mixture of  $\text{H}_2\text{O}:\text{CCl}_4:\text{CH}_3\text{CN}$  (3:2:2) was added  $\text{NaIO}_4$  (5.17 g, 24.2 mmol) and  $\text{RuCl}_3 \cdot n\text{H}_2\text{O}$  (0.063 g, 5.0 mol%). The reactional mixture was magnetically stirred at room temperature for 4 hours. Then, water was added and the aqueous phase was extracted with  $\text{CH}_2\text{Cl}_2$  (three times). The combined organic phases were washed with brine (twice) and dried over anhydrous  $\text{MgSO}_4$ . The solvent was removed under reduced pressure and the crude product was purified by flash chromatography (gradient elution 0-50%  $\text{AcOEt}$  in hexanes) affording the dione **5** (0.371 g, 2.41 mmol, 40%) as a colorless oil, the ceto-formate **6** (0.129 g, 0.701 mmol, 12%) as a colorless viscous oil, and the  $\alpha$ -hydroxy-lactone **7** (0.162 g, 0.880 mmol, 15%), as a white solid. **Formic acid 2-acetyl-5-methyl-cyclohexyl ester 6:** IR (film)  $1722\text{ cm}^{-1}$ ;  $^1\text{H}$  NMR (500 MHz,  $\text{CDCl}_3$ )  $\delta$  0.95 (d,  $J = 6.6$  Hz, 3H), 0.93-1.07 (m, 2H), 1.37 (dq,  $J = 3.6$  and  $13.2$  Hz, 1H), 1.55-1.61 (m, 1H), 1.73-1.78 (m, 1H), 1.97 (qd,  $J = 3.6$  and  $13.2$  Hz, 1H), 2.11-2.16 (m, 1H), 2.18 (s, 3H), 2.63 (ddd,  $J = 3.8, 10.6$  and  $12.7$  Hz, 1H), 5.10 (dt,  $J = 4.5$  and  $10.9$  Hz, 1H);  $^{13}\text{C}$  NMR (125 MHz,  $\text{CDCl}_3$ )  $\delta$  21.8, 27.8, 29.3, 30.8, 33.3, 39.3, 55.1, 73.1, 160.3, 209.5; MS  $m/z$  185 (11,  $\text{M}^+ + 1$ ); Anal. Calcd for  $\text{C}_{10}\text{H}_{16}\text{O}_3$ : C, 65.19; H, 8.75. Found: C, 65.20; H, 8.70. **3-Hydroxy-3,6-dimethyl-hexahydro-benzofuran-2-one 7:** IR (KBr)  $3471, 1764\text{ cm}^{-1}$ ;  $^1\text{H}$  NMR (300 MHz,  $\text{CDCl}_3$ )  $\delta$  0.99-1.13 (m, 1H), 1.03 (d,  $J = 6.6$  Hz, 3H), 1.20-1.37 (m, 2H), 1.31 (s, 3H), 1.55-1.65 (m, 1H), 1.81-2.01 (m, 3H), 2.22-2.29 (m, 1H), 2.97 (br s, H-OH), 3.81 (dt,  $J = 3.9$  and  $11.0$  Hz, 1H);  $^{13}\text{C}$  NMR (125 MHz,  $\text{CDCl}_3$ )  $\delta$  18.1, 22.0, 22.5, 31.3, 33.8, 38.7, 53.6, 74.8, 79.9, 180.5; MS  $m/z$  140 (8.7,  $\text{M}^+$ ); Anal. Calcd for  $\text{C}_{10}\text{H}_{16}\text{O}_3$ : C, 65.19; H, 8.75. Found: C, 64.95; H, 8.35.

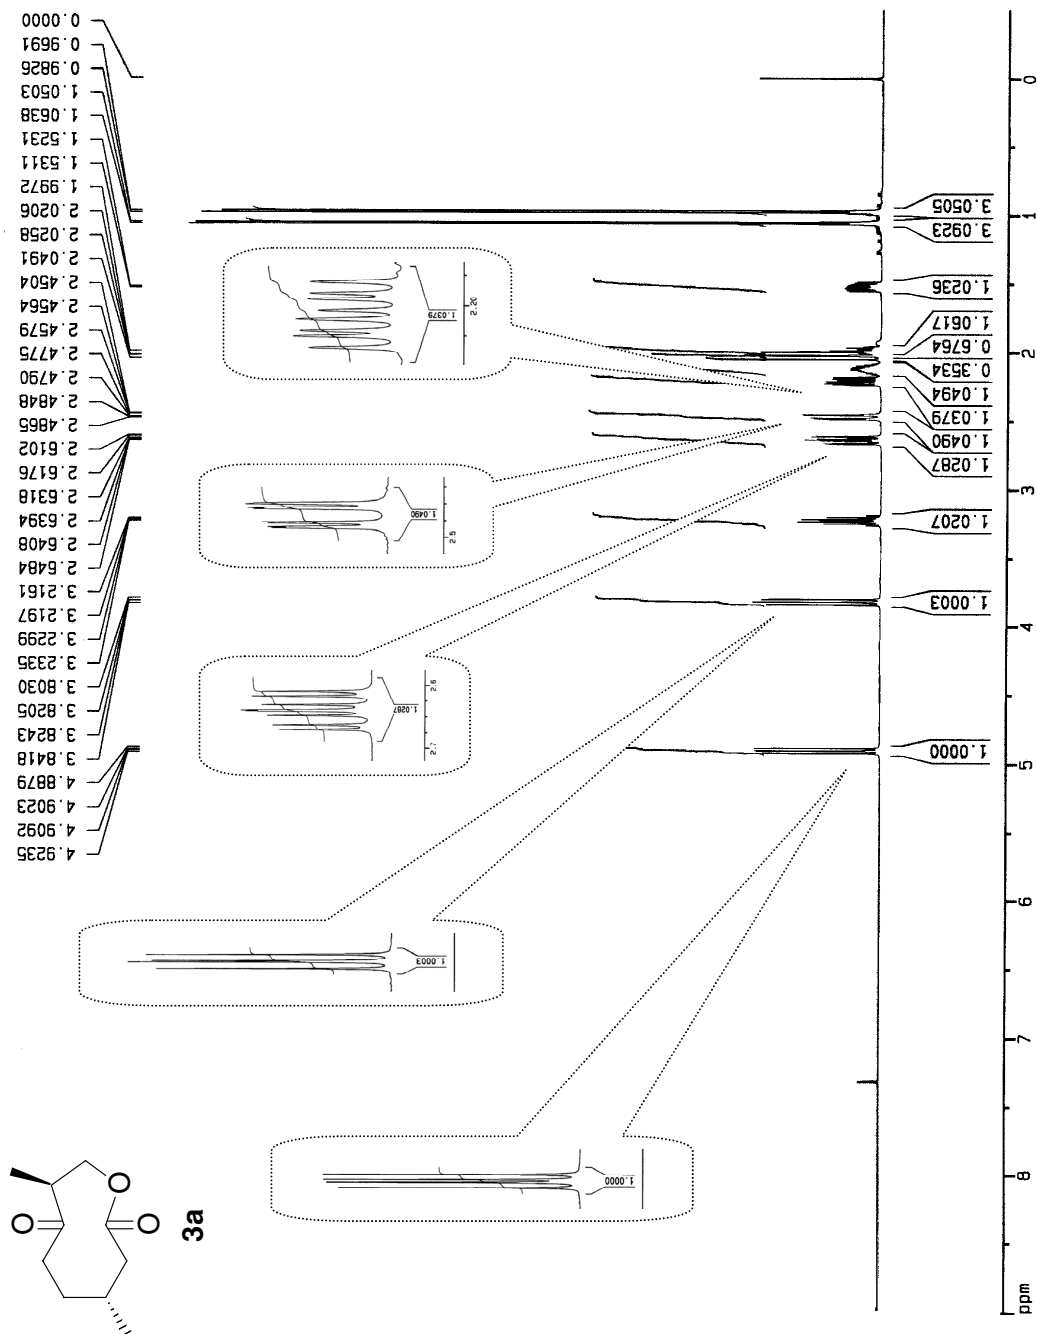

Figure S1. <sup>1</sup>H NMR spectrum of **3a** (CDCl<sub>3</sub>, 500 MHz, TMS, δ)

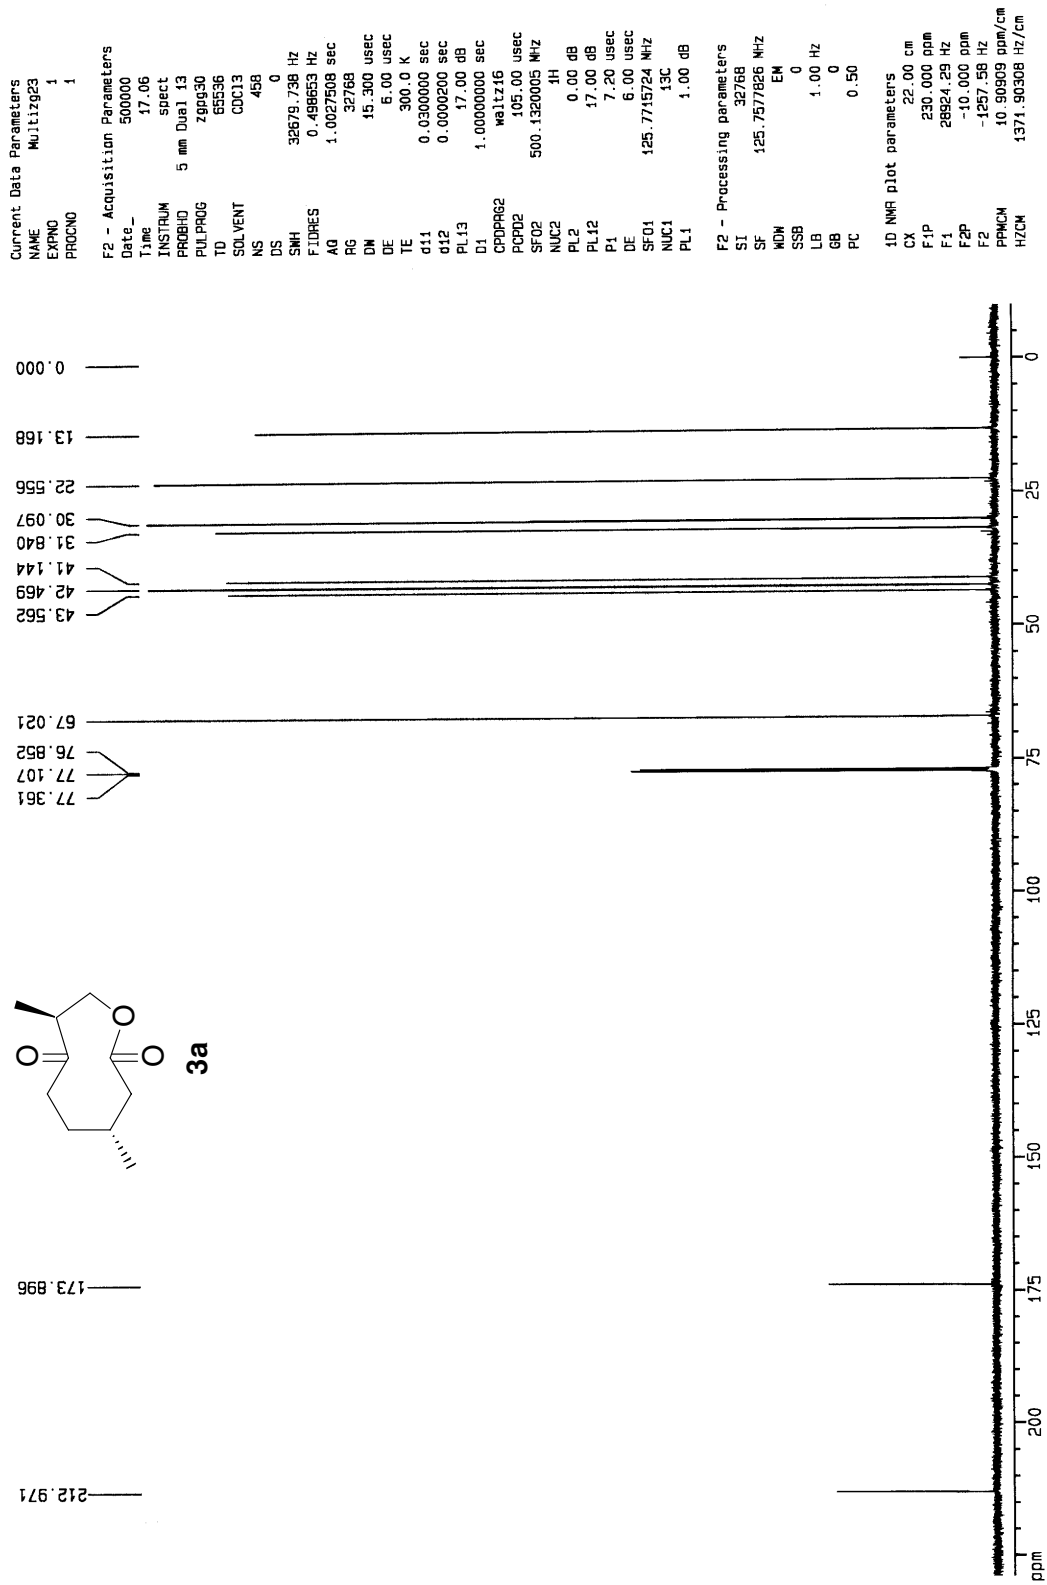

Figure S2. <sup>13</sup>C NMR spectrum of **3a** (CDCl<sub>3</sub>, 125 MHz, TMS, δ)

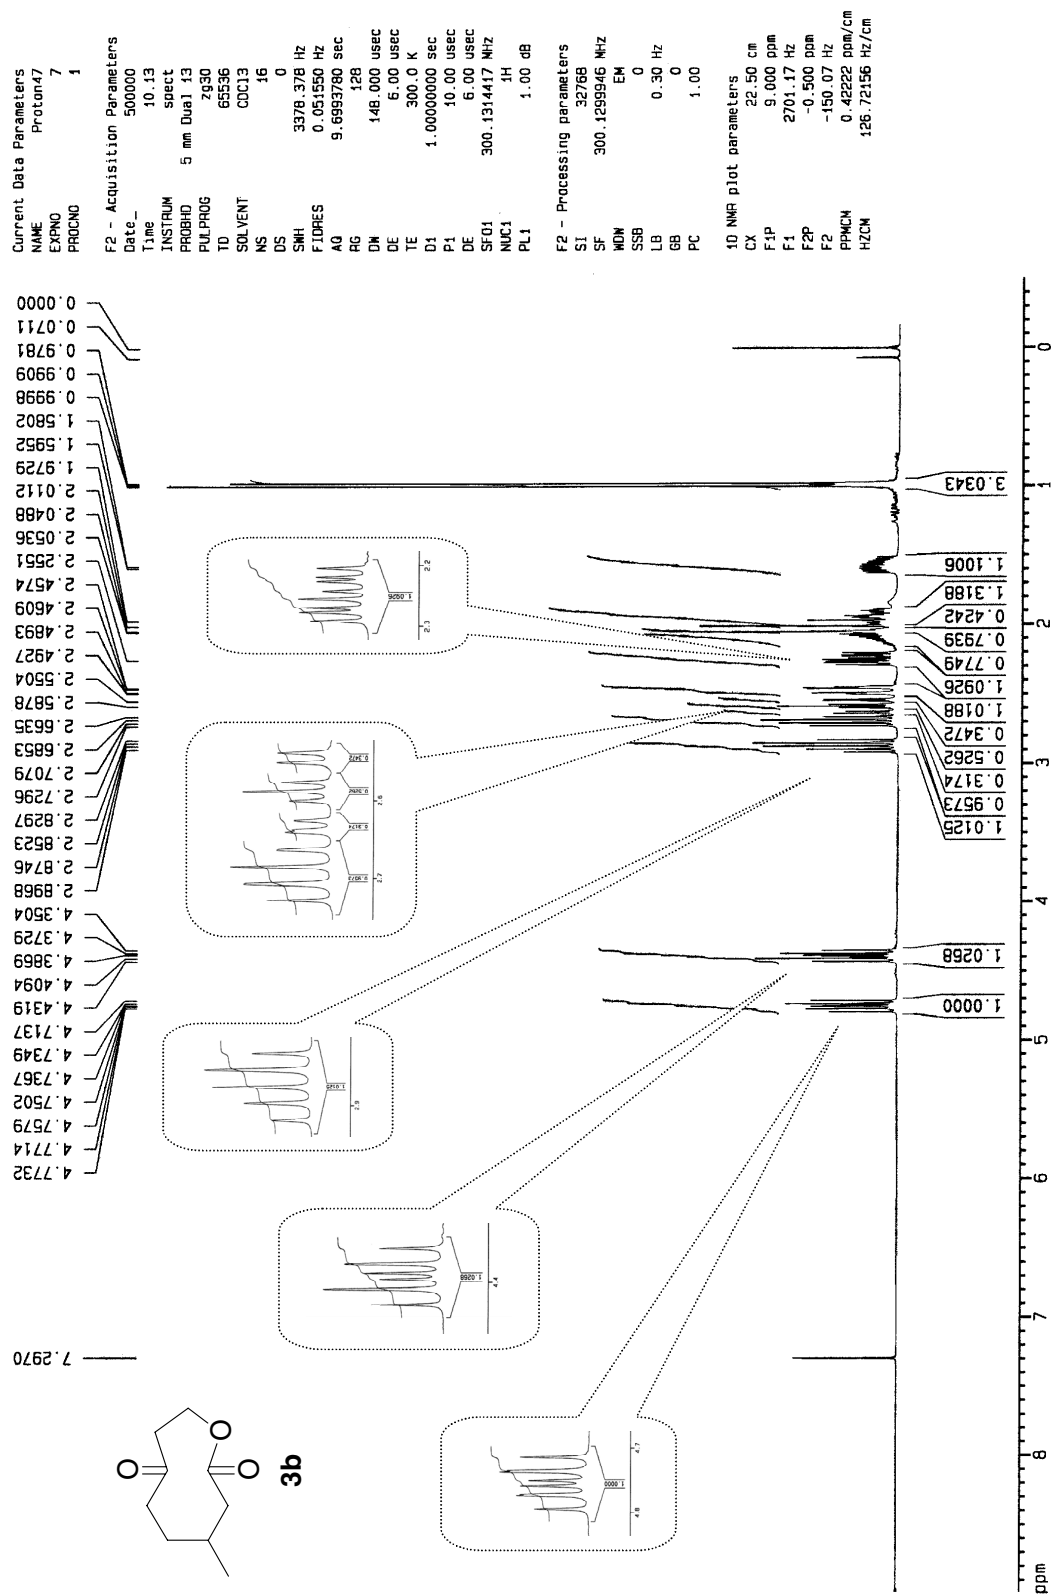

Figure S3. <sup>1</sup>H NMR spectrum of **3b** (CDCl<sub>3</sub>, 300 MHz, TMS, δ)

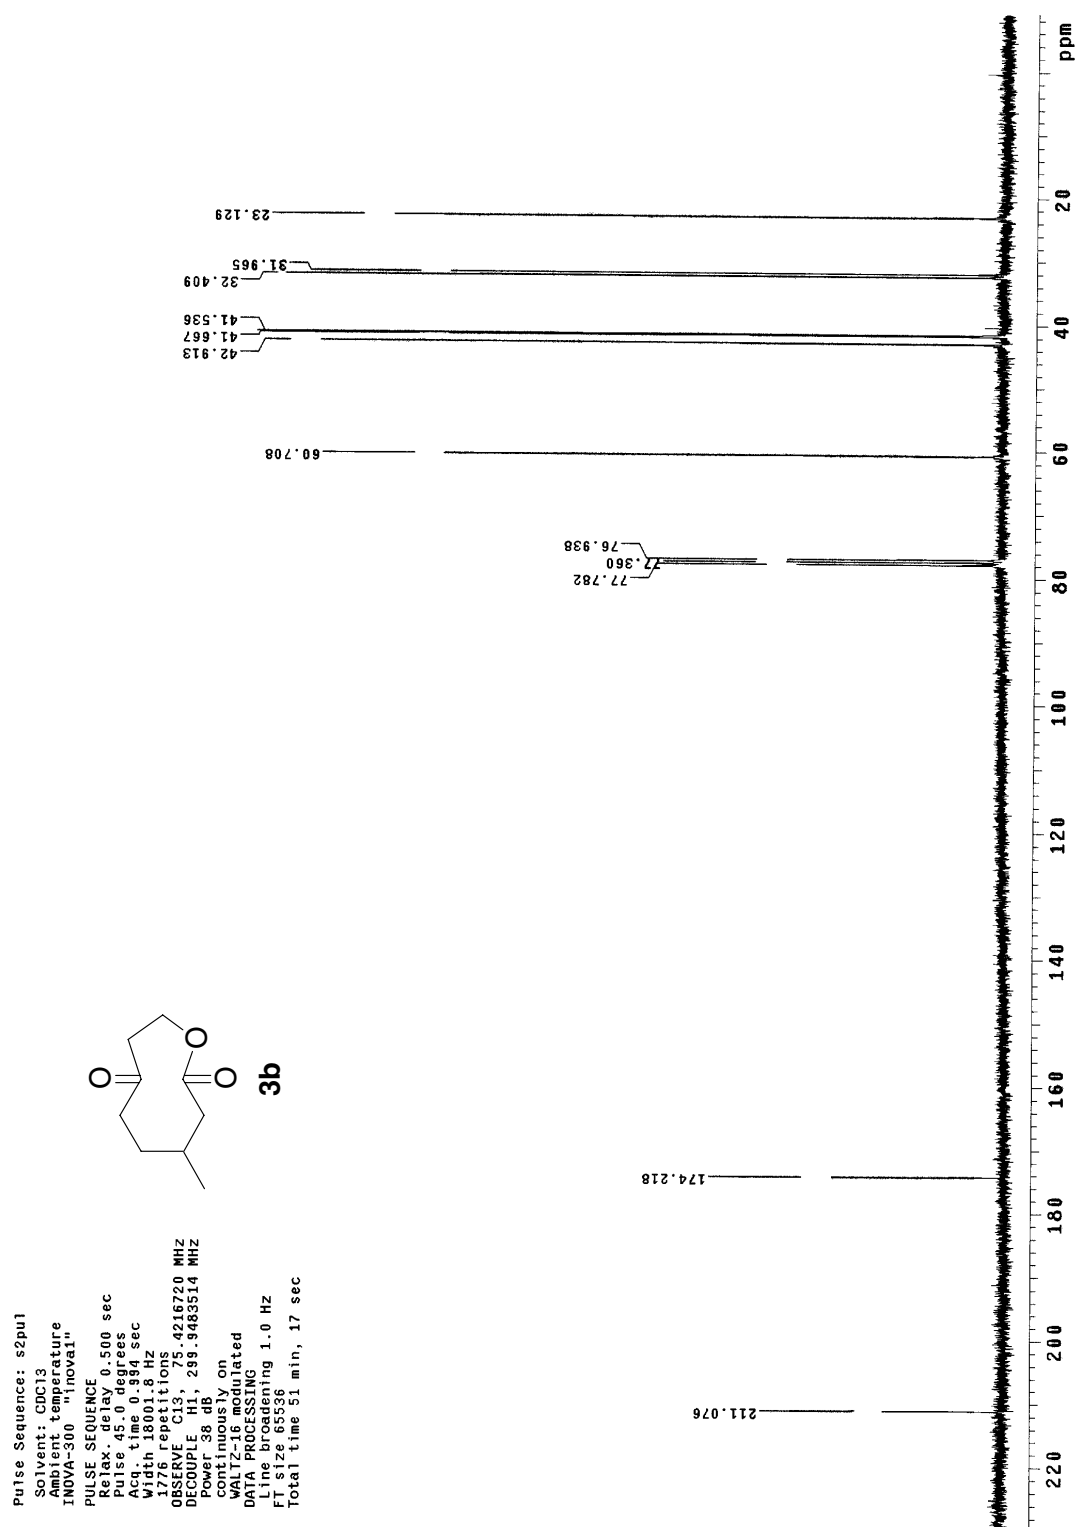

Figure S4. <sup>13</sup>C NMR spectrum of **3b** (CDCl<sub>3</sub>, 75 MHz, TMS, δ)



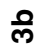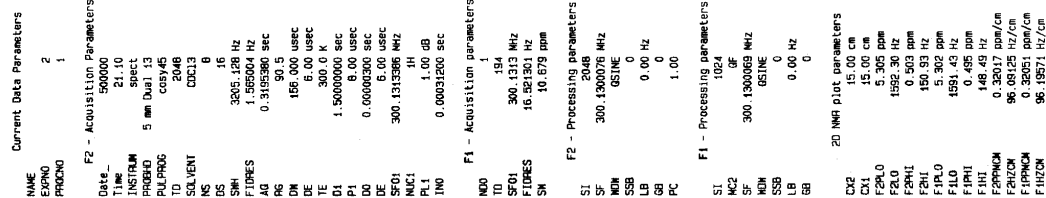

Figure S5. COSY spectrum of **3b** (CDCl<sub>3</sub>, 300 MHz, TMS,  $\delta$ )

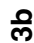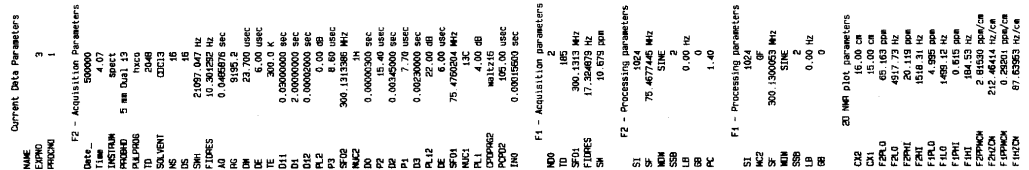

S10

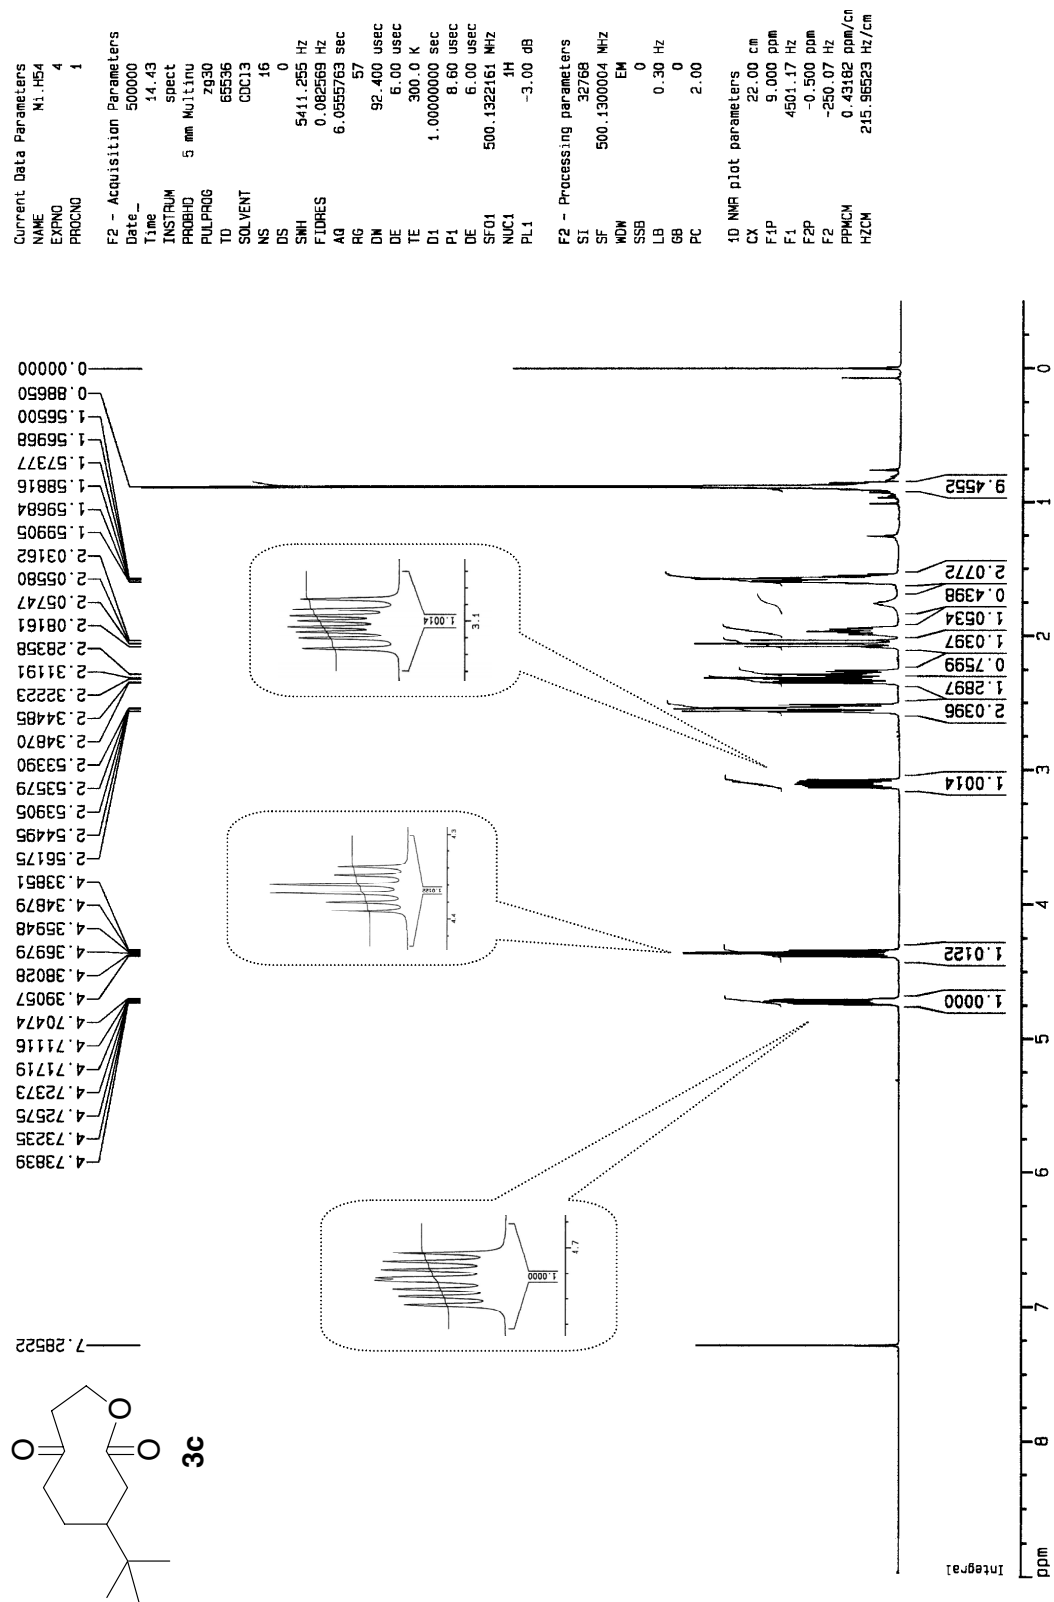

Figure S7. <sup>1</sup>H NMR spectrum of **3c** (CDCl<sub>3</sub>, 500 MHz, TMS, δ)

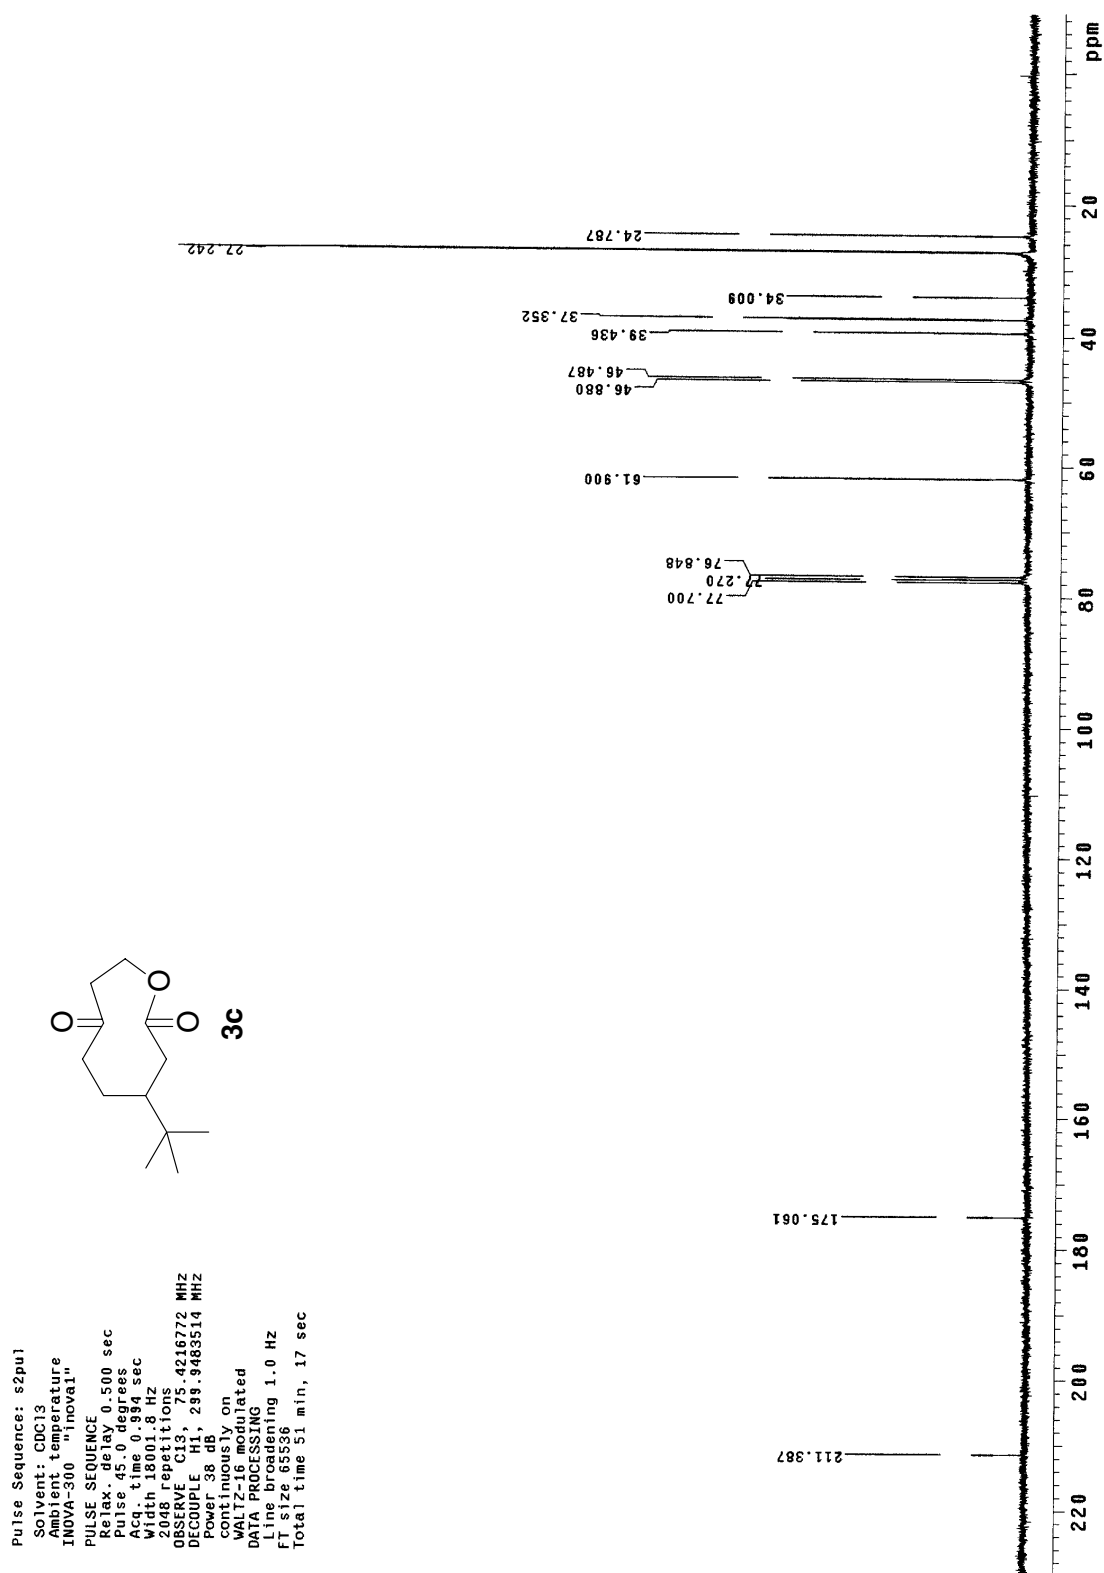

Figure S8. <sup>13</sup>C NMR spectrum of **3c** (CDCl<sub>3</sub>, 75 MHz, TMS, δ)

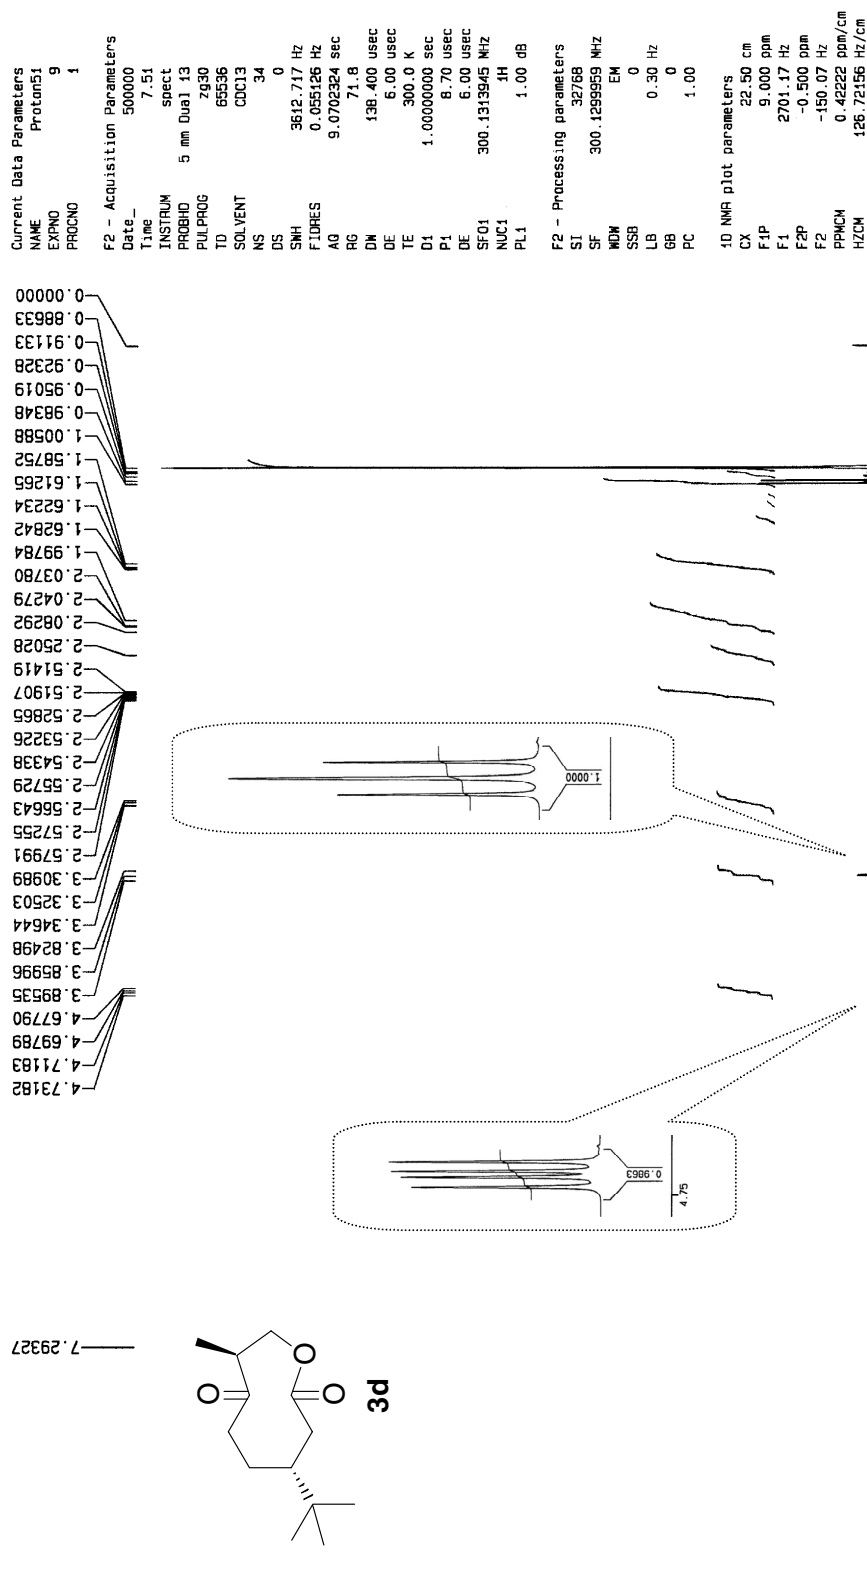

Figure S9.  $^1\text{H}$  NMR spectrum of **3d** ( $\text{CDCl}_3$ , 300 MHz, TMS,  $\delta$ )

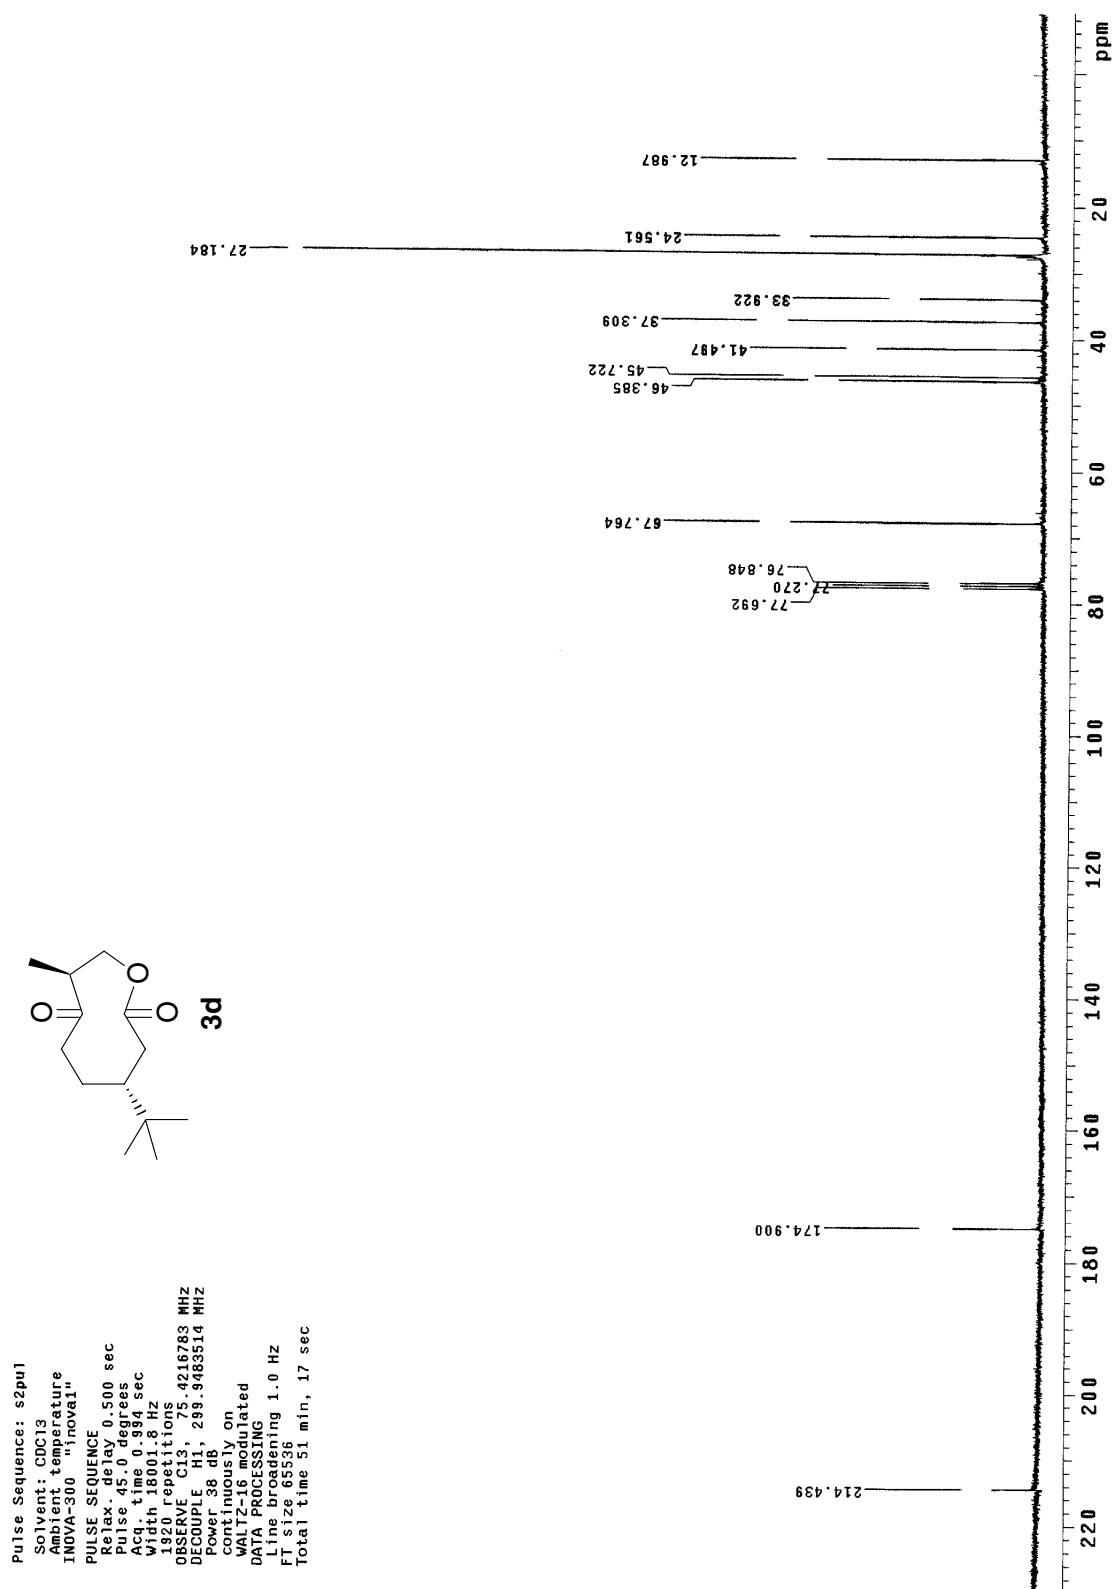

Figure S10.  $^{13}\text{C}$  NMR spectrum of **3d** ( $\text{CDCl}_3$ , 75 MHz, TMS,  $\delta$ )

## References

1. Descotes, G.; Yvon, Q. *Bull. Soc. Chim. Fr.* **1968**, 8, 3395.
2. Snider, B. B.; Shi, Z. *J. Am. Chem. Soc.* **1992**, 114, 1790.
